# Supplementary material for: Rutin-loaded polymeric nanorods alleviate nephrolithiasis by inhibiting inflammation and oxidative stress in vivo and in vitro
Source: Royal Society of Chemistry journal article supplement (doi:10.1039/d1fo02644e), 2022-01-01
Supplement: d1fo02644e1.pdf [file d1fo02644e1.pdf]

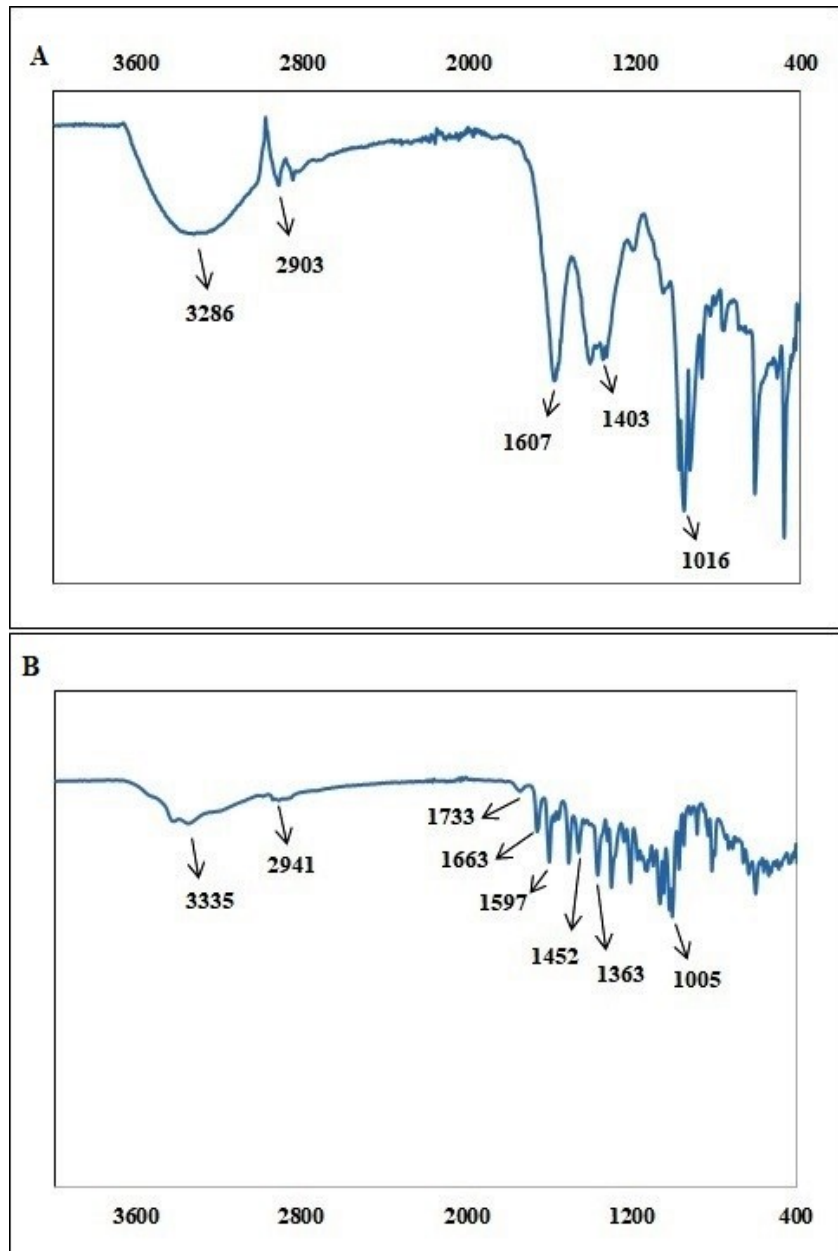

**Fig. S1** FTIR spectra of (A) pure rutin and (B) rutin nanorods.

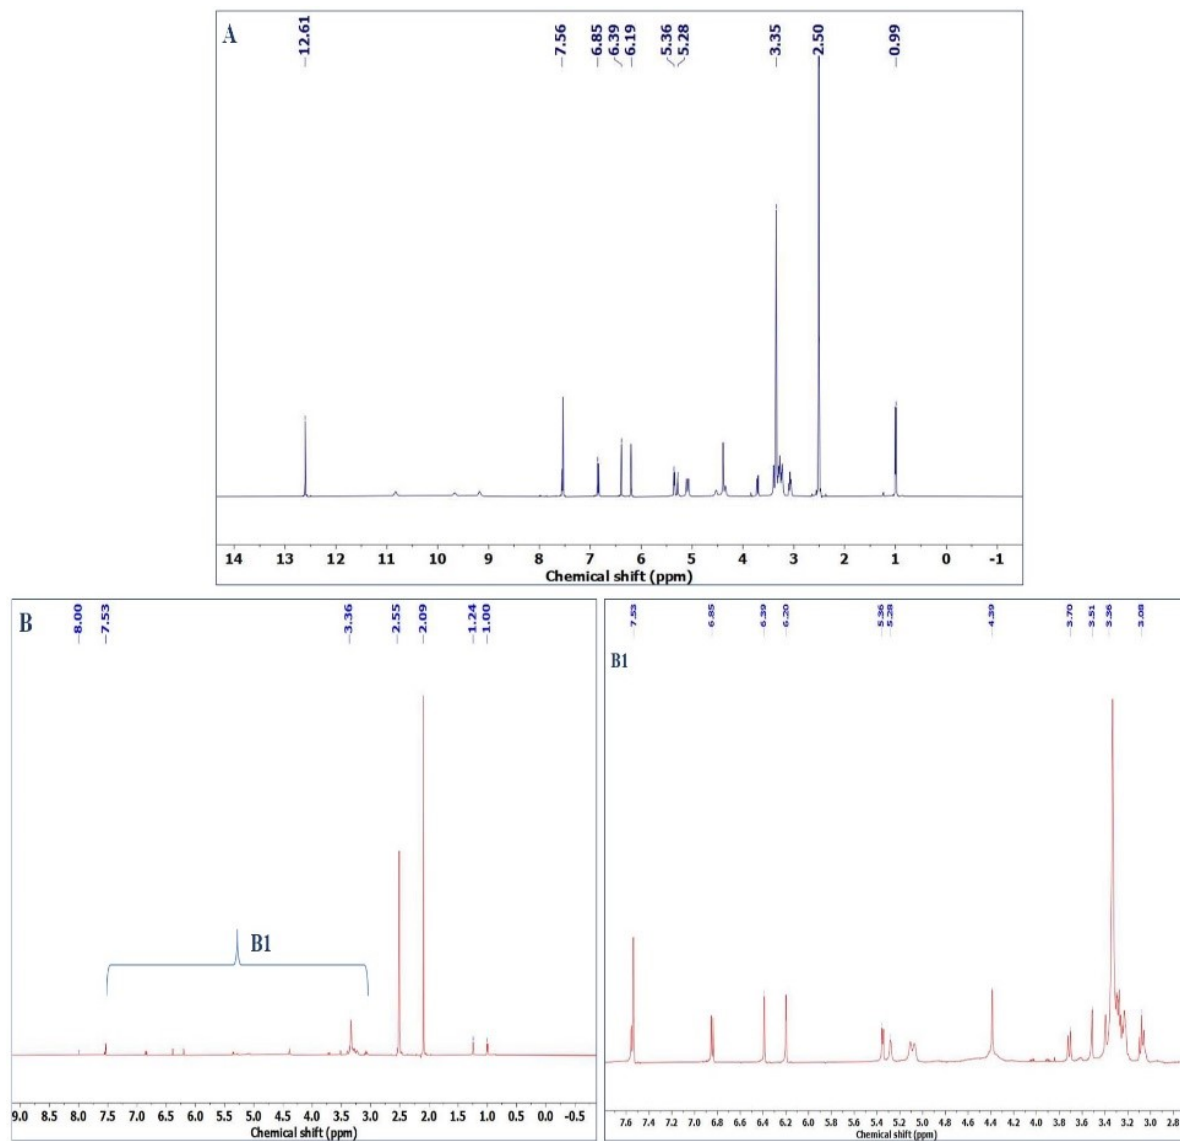

**Fig. S2**  $^1\text{H-NMR}$  spectra of (A) pure rutin and (B) rutin nanorods. (B1 correspond to  $^1\text{H-NMR}$  signals of rutin nanorods).

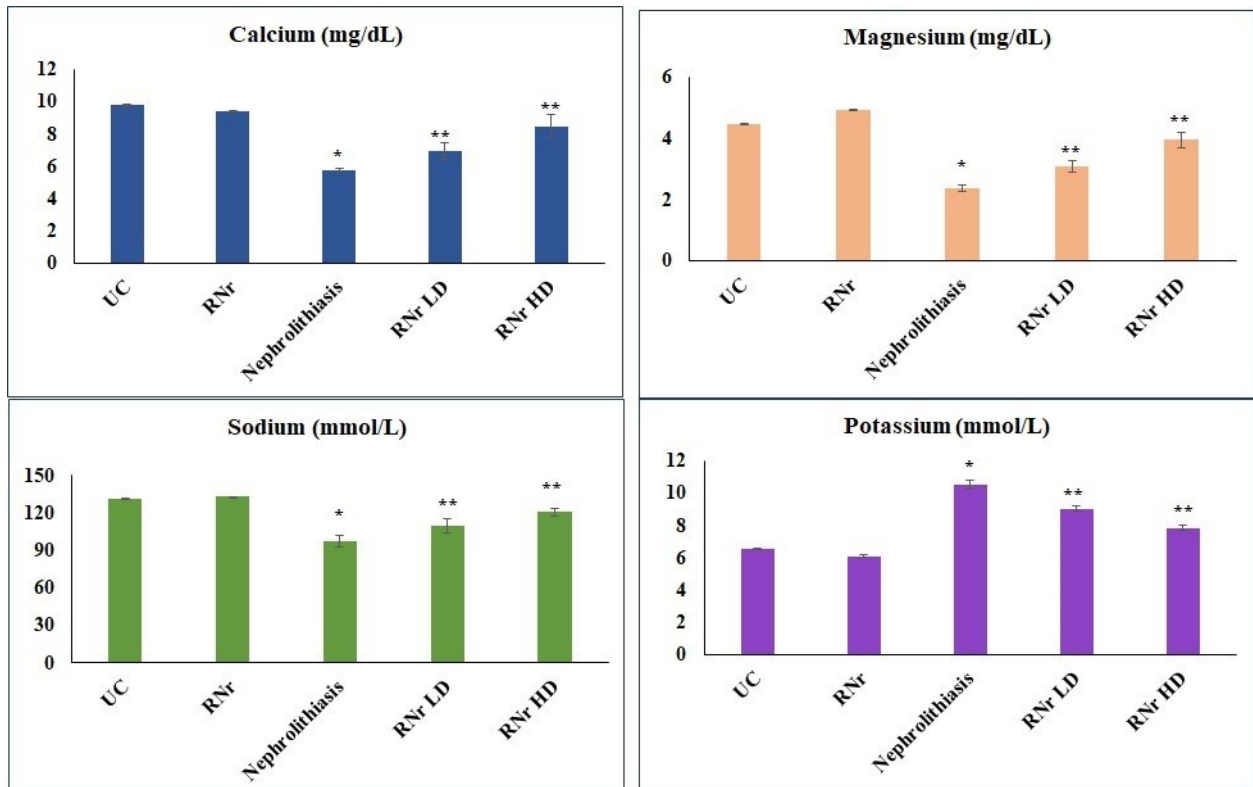

**Fig. S3** Prophylactic effect of oral administration of rutin nanorods in serum samples of rats. Results are expressed as mean  $\pm$  SD;  $n = 6$ . Level of significance  $p < 0.01$ . \*Compared with untreated control (UC); \*\*compared with (calcium oxalate) COM treated group (group 3).
